# Supplementary material
Source: publisher figshare collection journal article supplement (https://acs.figshare.com/ndownloader/files/5087347)

## Inhibition of Class D $\beta$ -Lactamases by Diaroyl Phosphates<sup>†</sup>

Sudipta Majumdar,<sup>‡</sup> S.A. Adediran,<sup>‡</sup> Michiyoshi Nukaga,<sup>§</sup> and R.F. Pratt<sup>\*‡</sup>

<sup>‡</sup> Department of Chemistry, Wesleyan University, Middletown, CT 06459

<sup>§</sup> Faculty of Pharmaceutical Sciences, Jyosai International University, 1 Gumyo, Togane-shi, Chiba 283-8555, Japan

Figure S1 Stereoview of an energy-minimized tetrahedral intermediate structure, **10**, formed on reaction of the OXA-1  $\beta$ -lactamase with the diaroyl phosphate **7**. Only heavy atoms are shown. This model was achieved by addition of the additional phenyl groups to the structure of Figure 4 of the main text, followed by molecular dynamics and energy minimizations as described in Materials and Methods.

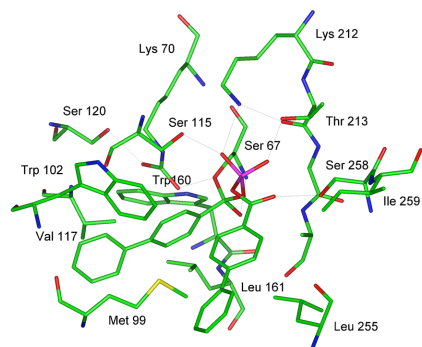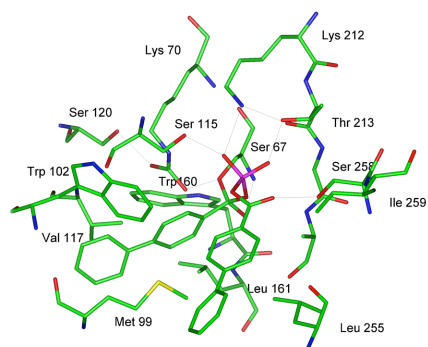

Supplement: Supplementary file 1 [file 5087347]
